# Supplementary material
Source: HighWire-hosted journal article supplement (https://www.cmajopen.ca/highwire/filestream/80980/field_highwire_adjunct_files/1/open-2015-0036-2-at.pdf)
Supplement: open-2015-0036-2-at.pdf [file open-2015-0036-2-at.pdf]

## Appendix 2 (as supplied by the authors): Search Strategy for RCD Studies

| Search | Most Recent Queries                                                                                                                                                                                                                                                                                                                                                                                                          |
|--------|------------------------------------------------------------------------------------------------------------------------------------------------------------------------------------------------------------------------------------------------------------------------------------------------------------------------------------------------------------------------------------------------------------------------------|
| #50    | Search #43 AND #47 AND #48                                                                                                                                                                                                                                                                                                                                                                                                   |
| #49    | Search #43 AND #47                                                                                                                                                                                                                                                                                                                                                                                                           |
| #48    | Search death*[tiab] OR dead*[tiab] OR die[tiab] OR died[tiab] OR dying[tiab] OR mortal*[tiab] OR fatal*[tiab] OR surviv*[tiab]                                                                                                                                                                                                                                                                                               |
| #47    | Search #45 OR #46                                                                                                                                                                                                                                                                                                                                                                                                            |
| #46    | Search propensity[All fields]                                                                                                                                                                                                                                                                                                                                                                                                |
| #45    | Search "Propensity Score"[mh]                                                                                                                                                                                                                                                                                                                                                                                                |
| #44    | Search #38 AND #43                                                                                                                                                                                                                                                                                                                                                                                                           |
| #43    | Search #39 OR #40 OR #41 OR #42                                                                                                                                                                                                                                                                                                                                                                                              |
| #42    | Search database*[tiab] OR "health care databases"[All fields] OR "healthcare databases"[All fields] OR "health care database"[All fields] OR "healthcare database"[All fields] OR "healthcare data"[All fields] OR "health care data"[All fields] OR "national database"[All fields]                                                                                                                                         |
| #41    | Search "Registries"[mh] OR register*[All fields] OR registr*[All fields]                                                                                                                                                                                                                                                                                                                                                     |
| #40    | Search record*[All fields] OR electronic*[All fields] OR "Personal Health"[All fields] OR EMR[All fields] OR EHR[All fields] OR PHR[All fields] OR "Electronic Health Records"[mh] OR "Health Records, Personal"[mh] OR "Medical Record Linkage"[mh] OR "Medical Records Systems, Computerized"[mh]                                                                                                                          |
| #39    | Search Administrative[All fields] OR claim*[All fields] OR "Insurance, Health, Reimbursement"[mh] OR reimbursement[All fields] OR utilization[All fields] OR utilisation[All fields] OR "Drug Utilization Review"[mh] OR Prescription*[All fields] OR Insurance[mh] OR Insur*[All fields] OR medicare[All fields] OR medicare[mh] OR medicaid[All fields] OR medicaid[mh] OR routine*[All fields] OR certificat*[All fields] |
| #38    | Search #1 OR #2 OR #3 OR #4 OR #5 OR #6 OR #7 OR #8 OR #9 OR #10 OR #11 OR #12 OR #13 OR #14 OR #15 OR #16 OR #17 OR #18 OR #19 OR #20 OR #21 OR #22 OR #23 OR #24 OR #25 OR #26 OR #27 OR #28 OR #29 OR #30 OR #31 OR #32 OR #33 OR #34 OR #35 OR #36 OR #37                                                                                                                                                                |
| #37    | Search "national database"[All fields]                                                                                                                                                                                                                                                                                                                                                                                       |
| #36    | Search "health care data"[All fields]                                                                                                                                                                                                                                                                                                                                                                                        |
| #35    | Search "healthcare data"[All fields]                                                                                                                                                                                                                                                                                                                                                                                         |
| #34    | Search "healthcare database"[All fields]                                                                                                                                                                                                                                                                                                                                                                                     |
| #33    | Search "health care database"[All fields]                                                                                                                                                                                                                                                                                                                                                                                    |
| #32    | Search "healthcare databases"[All fields]                                                                                                                                                                                                                                                                                                                                                                                    |
| #31    | Search "health care databases"[All fields]                                                                                                                                                                                                                                                                                                                                                                                   |
| #30    | Search database*[tiab]                                                                                                                                                                                                                                                                                                                                                                                                       |
| #29    | Search registr*[All fields]                                                                                                                                                                                                                                                                                                                                                                                                  |
| #28    | Search register*[All fields]                                                                                                                                                                                                                                                                                                                                                                                                 |
| #27    | Search "Registries"[mh]                                                                                                                                                                                                                                                                                                                                                                                                      |
| #26    | Search "Medical Records Systems, Computerized"[mh]                                                                                                                                                                                                                                                                                                                                                                           |
| #25    | Search "Medical Record Linkage"[mh]                                                                                                                                                                                                                                                                                                                                                                                          |
| #24    | Search "Health Records, Personal"[mh]                                                                                                                                                                                                                                                                                                                                                                                        |
| #23    | Search "Electronic Health Records"[mh]                                                                                                                                                                                                                                                                                                                                                                                       |
| #22    | Search PHR[All fields]                                                                                                                                                                                                                                                                                                                                                                                                       |
| #21    | Search EHR[All fields]                                                                                                                                                                                                                                                                                                                                                                                                       |
| #20    | Search EMR[All fields]                                                                                                                                                                                                                                                                                                                                                                                                       |
| #19    | Search "Personal Health"[All fields]                                                                                                                                                                                                                                                                                                                                                                                         |

---

|     |                                               |
|-----|-----------------------------------------------|
| #18 | Search electronic*[All fields]                |
| #17 | Search record*[All fields]                    |
| #16 | Search certificat*[All fields]                |
| #15 | Search routine*[All fields]                   |
| #14 | Search medicaid[mh]                           |
| #13 | Search medicaid[All fields]                   |
| #12 | Search medicare[mh]                           |
| #11 | Search medicare[All fields]                   |
| #10 | Search Insur*[All fields]                     |
| #9  | Search Insurance[mh]                          |
| #8  | Search Prescription*[All fields]              |
| #7  | Search "Drug Utilization Review"[mh]          |
| #6  | Search utilisation[All fields]                |
| #5  | Search utilization[All fields]                |
| #4  | Search reimbursement[All fields]              |
| #3  | Search "Insurance, Health, Reimbursement"[mh] |
| #2  | Search claim*[All fields]                     |
| #1  | Search Administrative[All fields]             |

---

**Search: Date: 23 Nov 2011; MEDLINE; Interface: PubMed**
